# Supplementary material for: Incidence of Catheter-Associated Bloodstream Infections in Stem Cell Recipients—Should We Be “PICCy”?
Source: MDPI journal article supplement (doi:10.3390/cancers16061239), 2024-03-21
Supplement: s1 [file s1]

| Causative pathogen                      | Peripheral catheter |        | Central catheter |        |
|-----------------------------------------|---------------------|--------|------------------|--------|
|                                         | BSI                 | CLABSI | BSI              | CLABSI |
| <i>Escherichia coli</i>                 | 3                   | 1      | 1                | 1      |
| <i>Escherichia coli</i> ESBL            |                     |        | 4                |        |
| <i>Staphylococcus aureus</i>            | 1                   |        |                  |        |
| <i>Klebsiella pneumoniae</i> ESBL       | 1                   | 1      |                  | 1      |
| <i>Staphylococcus mitis</i>             | 1                   |        |                  |        |
| <i>Klebsiella variicola</i>             | 1                   |        |                  |        |
| <i>Staphylococcus epidermidis</i> MRCNS | 2                   |        |                  | 2      |
| <i>Staphylococcus hominis</i>           | 1                   | 1      |                  |        |
| <i>Enterococcus faecium</i>             |                     | 1      | 2                |        |
| <i>Streptococcus vestibularis</i>       |                     | 1      |                  |        |
| <i>Enterococcus faecalis</i>            |                     |        | 1                |        |
| <i>Enterobacter cloacae</i> ESBL        |                     |        | 1                |        |
| <i>Streptococcus oralis</i>             |                     |        | 1                |        |
| <i>S.viridans</i>                       |                     |        | 1                |        |
| <i>Staphylococcus epidermidis</i>       |                     |        |                  | 2      |
| <i>Staphylococcus haemolyticus</i>      |                     |        |                  | 1      |

**Table S1.** Causative pathogens.

| Infection | Central catheter   | Peripheral catheter   | P value |
|-----------|--------------------|-----------------------|---------|
| FN        | 15.48(17),12.50-18 | 16.92(12.5), 11-18.25 | 0.27    |
| BSI       | 25.44(19), 18-23   | 14.11(14), 11-14      | 0.01    |
| CLABSI    | 18(15), 14-18.25   | 11.4(11), 11-12       | 0.04    |

**Table S2.** Time (in days) from catheter implantation to infection diagnosis. Data are reported as mean(median) and interquartile range. Mann Whitney U test,  $p < 0.05$  is considered statistically significant. FN – febrile neutropenia; BSI – bloodstream infection; CLABSI – Central line-associated bloodstream infections

| Infection | Central catheter    | Peripheral catheter | P value |
|-----------|---------------------|---------------------|---------|
| FN        | 6.78(6),5-8.5       | 7.192(5), 4-7       | 0.43    |
| BSI       | 12.33(9), 5-13      | 7.78(6), 5-7        | 0.45    |
| CLABSI    | 13.5(10), 7.5-13.25 | 4.2(5), 1-6         | 0.03    |

**Table S3.** Time (in days) from the beginning of neutropenia to infection diagnosis. Data are reported as mean (median) and interquartile range. Mann Whitney U test,  $p < 0.05$  is considered statistically significant. FN – febrile neutropenia; BSI – bloodstream infection; CLABSI – Central line-associated bloodstream infections.
